# Supplementary material for: Implications of SARS-CoV-2 Mutations for Genomic RNA Structure and Host microRNA Targeting
Source: MDPI journal article supplement (doi:10.3390/ijms21134807), 2020-07-07
Supplement: s1 [file s1]

**Table S1.** Sequence alignment and identification of recurrent mutations identified in the SARS-CoV-2 genome.

|     | Sequence identifiers | % Pairwise identity | Country          | Conserved mutation(s)                               |
|-----|----------------------|---------------------|------------------|-----------------------------------------------------|
| Ref | NC_045512.2          |                     | China            |                                                     |
| 1   | MT276598.1           | 99.97               | Israel           | C241U/C313U/C3037U/C14408U/A23403G/GGG28881-4AAC    |
| 2   | MT066176.1           | 99.99               | Taiwan           |                                                     |
| 3   | MT262993.1           | 99.9                | Pakistan         |                                                     |
| 4   | MT344962.1           | 99.98               | USA/Minnesota    | Del 1606-1609                                       |
| 5   | MT344959.1           | 99.98               | USA/Pennsylvania | C241U/C1059U/C3037U/C14408U/A23403G/G25563U         |
| 6   | MT304476.1           | 99.98               | South Korea      | G11083U/C14805U/G26144U/C28311U                     |
| 7   | MT276326.1           | 99.98               | USA/Georgia      | G11083U/C14805U/G26144U                             |
| 8   | MT320538.2           | 99.98               | France           | C241U/C3037U/C14408U/A23403G                        |
| 9   | MT344960.1           | 99.98               | USA/Rhode Island | C241U/C1059U/C3037U/C14408U/A23403G/G25563U/C27964U |
| 10  | MT344961.1           | 99.98               | USA/Nevada       | Del 1606-1609                                       |
| 11  | MT328034.1           | 99.97               | Greece           | C8782U/C14805U/ U28134C                             |
| 12  | MT093571.1           | 99.98               | Sweden           | G26144U                                             |
| 13  | MT114415.1           | 99.99               | Hong Kong        | G1397A/G11083U/U28688C/G29742U                      |
| 14  | MT350282.1           | 99.98               | Brazil           | G11083U/C14408U/C14805U/U17247C/G26144U             |
| 15  | MT470156.1           | 99.97               | France           | C241U/C313U/C3037U/A23403G/GGG28881-4AAC            |
| 16  | MT328035.1           | 99.97               | Greece           | C241U/C3037U/C14408U/A23403G/GGG28881-4AAC          |
| 17  | MT371050.1           | 99.99               | Sri Lanka        | C14805U/U17247C/G26144U                             |
| 18  | MT370518.1           | 99.98               | Taiwan           | C1059U/G1397A/G11083U/U28688C/G29742U               |
| 19  | LC542976.1           | 99.99               | Japan            | C8782U/ U28134C                                     |
| 20  | MT371047.1           | 99.97               | Sri Lanka        | G1397A/G11083U/U28688C/G29742U                      |
| 21  | MT324062.1           | 99.98               | South Africa     | C241U/C3037U/C14408U/A23403G                        |
| 22  | MT396241.1           | 99.99               | China            |                                                     |
| 23  | MT007544.1           | 99.96               | Australia        | G26144U                                             |
| 24  | MT385418.1           | 99.97               | USA/California   | C241U/C313U/C3037U/C14408U/A23403G/GGG28881-4AAC    |
| 25  | MT374105.1           | 99.99               | Taiwan           | G11083U/C14805U/U17247C/G26144U                     |
| 26  | MT374116.1           | 99.97               | Taiwan           | C241U/C3037U/C14408U/A23403G/GGG28881-4AAC          |
| 27  | MT327745.1           | 99.98               | Turkey           | G1397A/G11083U/U28688C/G29742U                      |
| 28  | MT358402.1           | 99.97               | USA/Louisiana    | C241U/C1059U/C3037U/C14408U/A23403G/G25563U/C27964U |
| 29  | MT263074.1           | 99.97               | Peru             | C241U/C3037U/C14408U/A23403G/GGG28881-4AAC          |
| 30  | MT359866.1           | 99.97               | Spain            | C241U/C313U/C3037U/C14408U/A23403G/GGG28881-4AAC    |
| 31  | MT385486.1           | 98.6                | USA/California   | G11083U/C28311U                                     |
| 32  | MT072688.1           | 99.99               | Nepal            | C24023U                                             |
| 33  | LC553263.1           | 99.97               | Japan            | C241U/C313U/C3037U/C14408U/A23403G/GGG28881-4AAC    |
| 34  | MT114419.1           | 99.99               | Hong Kong        | G11083U                                             |
| 35  | MT396242.1           | 99.5                | India            | C241U/C313U/C3037U/C14408U/A23403G/GGG28881-4AAC    |
| 36  | MT375478.1           | 99.97               | USA/Washington   | C241U/C1059U/C3037U/C14408U/A23403G/G25563U         |
| 37  | MT240479.1           | 99.98               | Pakistan         | C241U/G1397A/G11083U                                |
| 38  | MT372482.1           | 99.1                | Malaysia         | G11083U/C28311U                                     |
| 39  | MT350242.1           | 99.9                | USA/Virginia     | C241U/C1059U/C14408U/A23403G/G25563U                |
| 40  | MT320891.2           | 99.98               | Iran             | G1397A/G11083U/G29742U                              |
| 41  | MT198651.1           | 96.4                | Spain            | C8782U/C14805U/U28134C                              |
| 42  | MT292575.1           | 99.98               | Spain            | C241U/C3037U/C14408U/A23403G                        |
| 43  | MT582453.1           | 99.97               | Germany          | C241U/C1059U/C3037U/C14408U/A23403G/G25563U         |
| 44  | MT371035.1           | 99.97               | USA/New York     | C241U/C1059U/C3037U/C14408U/A23403G/G25563U         |
| 45  | MT370841.1           | 99.96               | USA/New York     | C8782U/A23403G/C24023U/U28134C                      |
| 46  | MT077125.1           | 99.99               | Italy            | G11083U/G26144U                                     |
| 47  | MT370933.1           | 99.98               | USA/New Jersey   | C241U/C1059U/C3037U/C14408U/A23403G/G25563U         |
| 48  | MT358731.1           | 99.97               | USA/Washington   | C241U/C1059U/C3037U/C14408U/A23403G/G25563U         |
| 49  | MT371574.1           | 99.98               | Czech Republic   | C241U/C3037U/C14408U/A23403G/GGG28881-4AAC          |
| 50  | MT375471.1           | 99.98               | USA/Connecticut  | C1059U/C3037U/C14408U/A23403G/G25563U               |
| 51  | MT451006.1           | 99.99               | Australia        | Del 1606-1609                                       |
| 52  | MT457394.1           | 99.95               | Nederland        | Del 1606-1609                                       |
| 53  | MT451263.1           | 99.5                | Australia        | C241U/C3037U/G9802U/C14408U/A23403G                 |
| 54  | MT496988.1           | 99.98               | India            | C241U/C3037U/G9802U/C14408U/A23403G/G25563U         |
| 55  | EPI_ISL_416425       | 99.9                | China            | G9802U                                              |
| 56  | EPI_ISL_417211       | 99.98               | New Zealand      | Del 1606-1609                                       |
| 57  | EPI_ISL_416429       | 99.98               | Vietnam          | C8782U/C24023U/U28134C                              |
| 58  | EPI_ISL_419222       | 99.6                | Hong Kong        | G26144U                                             |
| 59  | EPI_ISL_422940       | 99.5                | Netherlands      | C241U/C3037U/G9803U/C14408U/A23403G/GGG28881-4AAC/  |
| 60  | MT451063.1           | 99.3                | Australia        | C8781U/G9803U                                       |
| 61  | MT380727.1           | 99.9                | Iran             | U28688C                                             |
| 62  | MT512430.1           | 99.99               | USA/Atlanta      | G9803U                                              |
| 63  | EPI_ISL_417212       | 99.97               | New Zealand      | C14805U/G26144U                                     |
| 64  | EPI_ISL_429691       | 90.2                | Brazil           | C3037U/C14408U/A23403G/GGG28881-4AAC                |
| 65  | EPI_ISL_416538       | 99.6                | New Zealand      | C8781U/C24034U                                      |

**Table S2.** Mutational analysis of SAR-CoV-2 sequences analyzed in the current study.

| Sequence identifiers       | Sd     | Sn      | S         | N          | ps     | pn     | ds     | dn     | ds/dn  | ps/pn  |
|----------------------------|--------|---------|-----------|------------|--------|--------|--------|--------|--------|--------|
| China-EPI_ISL_416425       | 5.0000 | 5.0000  | 6559.3333 | 23341.6667 | 0.0008 | 0.0002 | 0.0008 | 0.0002 | 3.5598 | 3.5585 |
| Israel-MT276598.1          | 5.0000 | 3.0000  | 6556.0000 | 23309.0000 | 0.0008 | 0.0001 | 0.0008 | 0.0001 | 5.9281 | 5.9256 |
| Taiwan-MT066176.1          | 1.0000 | 1.0000  | 6556.3333 | 23311.6667 | 0.0002 | 0.0000 | 0.0002 | 0.0000 | 3.5559 | 3.5556 |
| Vietnam-EPI_ISL_416429     | 4.0000 | 3.0000  | 6556.6667 | 23311.3333 | 0.0006 | 0.0001 | 0.0006 | 0.0001 | 4.7420 | 4.7405 |
| USA-MT344962.1             | 2.0000 | 0.0000  | 6556.6667 | 23314.3333 | 0.0003 | 0.0000 | 0.0003 | 0.0000 | nan    | nan    |
| USA-MT512430.1             | 1.0000 | 0.0000  | 6557.3333 | 23322.6667 | 0.0002 | 0.0000 | 0.0002 | 0.0000 | nan    | nan    |
| France-MT320538.2          | 3.0000 | 3.0000  | 6557.5000 | 23322.5000 | 0.0005 | 0.0001 | 0.0005 | 0.0001 | 3.5574 | 3.5566 |
| USA-MT276326.1             | 1.0000 | 5.0000  | 6557.3333 | 23322.6667 | 0.0002 | 0.0002 | 0.0002 | 0.0002 | 0.7113 | 0.7113 |
| USA-MT344960.1             | 4.0000 | 3.0000  | 6557.5000 | 23322.5000 | 0.0006 | 0.0001 | 0.0006 | 0.0001 | 4.7437 | 4.7422 |
| USA-MT344959.1             | 3.0000 | 3.0000  | 6556.5000 | 23320.5000 | 0.0005 | 0.0001 | 0.0005 | 0.0001 | 3.5576 | 3.5569 |
| USA-MT344961.1             | 1.0000 | 1.0000  | 6556.5000 | 23317.5000 | 0.0002 | 0.0000 | 0.0002 | 0.0000 | 3.5567 | 3.5564 |
| South_Korea-MT304476.1     | 0.0000 | 5.0000  | 6557.3333 | 23322.6667 | 0.0000 | 0.0002 | 0.0000 | 0.0002 | nan    | nan    |
| Greece-MT328034.1          | 4.0000 | 5.0000  | 6557.8333 | 23325.1667 | 0.0006 | 0.0002 | 0.0006 | 0.0002 | 2.8462 | 2.8455 |
| Sweden-MT093571.1          | 2.0000 | 5.0000  | 6558.1667 | 23324.8333 | 0.0003 | 0.0002 | 0.0003 | 0.0002 | 1.4227 | 1.4226 |
| Hong Kong-MT114415.1       | 1.0000 | 3.0000  | 6558.6667 | 23330.3333 | 0.0002 | 0.0001 | 0.0002 | 0.0001 | 1.1857 | 1.1857 |
| Brazil-MT350282.1          | 0.0000 | 6.0000  | 6559.1667 | 23341.8333 | 0.0000 | 0.0003 | 0.0000 | 0.0003 | nan    | nan    |
| France-MT470156.1          | 5.0000 | 3.0000  | 6560.0000 | 23341.0000 | 0.0008 | 0.0001 | 0.0008 | 0.0001 | 5.9326 | 5.9301 |
| Greece-MT328035.1          | 4.0000 | 4.0000  | 6559.8333 | 23341.1667 | 0.0006 | 0.0002 | 0.0006 | 0.0002 | 3.5592 | 3.5582 |
| Hong Kong-EPI_ISL_419222   | 1.0000 | 3.0000  | 6537.0000 | 23244.0000 | 0.0002 | 0.0001 | 0.0002 | 0.0001 | 1.1853 | 1.1853 |
| Japan-LC542976.1           | 4.0000 | 0.0000  | 6559.3333 | 23341.6667 | 0.0006 | 0.0000 | 0.0006 | 0.0000 | nan    | nan    |
| NewZealand-EPI_ISL_416538  | 4.0000 | 7.0000  | 6537.8333 | 23243.1667 | 0.0006 | 0.0003 | 0.0006 | 0.0003 | 2.0320 | 2.0315 |
| Sri Lanka-MT371047.1       | 4.0000 | 6.0000  | 6560.1667 | 23340.8333 | 0.0006 | 0.0003 | 0.0006 | 0.0003 | 2.3725 | 2.3720 |
| South Africa-MT324062.1    | 4.0000 | 2.0000  | 6559.5000 | 23341.5000 | 0.0006 | 0.0001 | 0.0006 | 0.0001 | 7.1193 | 7.1169 |
| Taiwan-MT370518.1          | 2.0000 | 5.0000  | 6559.6667 | 23341.3333 | 0.0003 | 0.0002 | 0.0003 | 0.0002 | 1.4234 | 1.4233 |
| Sri Lanka_-MT371050.1      | 1.0000 | 3.0000  | 6559.5000 | 23341.5000 | 0.0002 | 0.0001 | 0.0002 | 0.0001 | 1.1862 | 1.1861 |
| China-MT396241.1           | 1.0000 | 0.0000  | 6559.3333 | 23335.6667 | 0.0002 | 0.0000 | 0.0002 | 0.0000 | nan    | nan    |
| Australia-MT007544.1       | 0.0000 | 3.0000  | 6556.1667 | 23332.8333 | 0.0000 | 0.0001 | 0.0000 | 0.0001 | nan    | nan    |
| USA-MT385418.1             | 5.0000 | 4.0000  | 6560.0000 | 23341.0000 | 0.0008 | 0.0002 | 0.0008 | 0.0002 | 4.4494 | 4.4476 |
| Taiwan-MT374105.1          | 0.0000 | 4.0000  | 6558.6667 | 23339.3333 | 0.0000 | 0.0002 | 0.0000 | 0.0002 | nan    | nan    |
| Taiwan-MT374116.1          | 5.0000 | 3.0000  | 6559.3333 | 23338.6667 | 0.0008 | 0.0001 | 0.0008 | 0.0001 | 5.9326 | 5.9301 |
| Turkey-MT327745.1          | 2.0000 | 4.0000  | 6550.1667 | 23281.8333 | 0.0003 | 0.0002 | 0.0003 | 0.0002 | 1.7774 | 1.7772 |
| USA-MT358402.1             | 5.0000 | 5.0000  | 6558.6667 | 23336.3333 | 0.0008 | 0.0002 | 0.0008 | 0.0002 | 3.5594 | 3.5581 |
| Peru-MT263074.1            | 5.0000 | 4.0000  | 6553.6667 | 23299.3333 | 0.0008 | 0.0002 | 0.0008 | 0.0002 | 4.4457 | 4.4439 |
| Nederland-MT457394.1       | 5.0000 | 6.0000  | 6556.0000 | 23318.0000 | 0.0008 | 0.0003 | 0.0008 | 0.0003 | 2.9650 | 2.9640 |
| Spain-MT359866.1           | 5.0000 | 4.0000  | 6558.0000 | 23334.0000 | 0.0008 | 0.0002 | 0.0008 | 0.0002 | 4.4494 | 4.4476 |
| USA-MT385486.1             | 3.0000 | 4.0000  | 6466.3333 | 23002.6667 | 0.0005 | 0.0002 | 0.0005 | 0.0002 | 2.6685 | 2.6680 |
| Nepal-MT072688.1           | 1.0000 | 0.0000  | 6543.3333 | 23264.6667 | 0.0002 | 0.0000 | 0.0002 | 0.0000 | nan    | nan    |
| Japan-LC553263.1           | 6.0000 | 4.0000  | 6556.3333 | 23326.6667 | 0.0009 | 0.0002 | 0.0009 | 0.0002 | 5.3395 | 5.3368 |
| Hong-Kong-MT114419.1       | 1.0000 | 1.0000  | 6552.5000 | 23309.5000 | 0.0002 | 0.0000 | 0.0002 | 0.0000 | 3.5576 | 3.5573 |
| India-MT396242.1           | 5.0000 | 8.0000  | 6511.5000 | 23149.5000 | 0.0008 | 0.0003 | 0.0008 | 0.0003 | 2.2226 | 2.2220 |
| USA-MT375478.1             | 3.0000 | 6.0000  | 6552.0000 | 23316.0000 | 0.0005 | 0.0003 | 0.0005 | 0.0003 | 1.7795 | 1.7793 |
| Pakistan-MT240479.1        | 2.0000 | 4.0000  | 6547.6667 | 23287.3333 | 0.0003 | 0.0002 | 0.0003 | 0.0002 | 1.7785 | 1.7783 |
| Australia-MT451263.1       | 4.0000 | 2.0000  | 6448.8333 | 22987.1667 | 0.0006 | 0.0001 | 0.0006 | 0.0001 | 7.1316 | 7.1291 |
| USA-MT350242.1             | 3.0000 | 4.0000  | 6548.8333 | 23301.1667 | 0.0005 | 0.0002 | 0.0005 | 0.0002 | 2.6691 | 2.6685 |
| Malaysia-MT372482.1        | 6.5000 | 30.5000 | 6488.8333 | 23121.1667 | 0.0010 | 0.0013 | 0.0010 | 0.0013 | 0.7592 | 0.7594 |
| Australia-MT451006.1       | 0.0000 | 1.0000  | 6543.0000 | 23253.0000 | 0.0000 | 0.0000 | 0.0000 | 0.0000 | nan    | nan    |
| India-MT496988.1           | 6.0000 | 4.0000  | 6543.1667 | 23255.8333 | 0.0009 | 0.0002 | 0.0009 | 0.0002 | 5.3340 | 5.3313 |
| Iran-MT320891.2            | 1.0000 | 4.0000  | 6545.3333 | 23274.6667 | 0.0002 | 0.0002 | 0.0002 | 0.0002 | 0.8890 | 0.8890 |
| Australia-MT451063.1       | 5.0000 | 2.0000  | 6473.8333 | 23025.1667 | 0.0008 | 0.0001 | 0.0008 | 0.0001 | 8.8957 | 8.8916 |
| Spain-MT198651.1           | 3.0000 | 5.0000  | 6155.0000 | 21958.0000 | 0.0005 | 0.0002 | 0.0005 | 0.0002 | 2.1409 | 2.1405 |
| Netherlands-EPI_ISL_422940 | 6.0000 | 4.0000  | 6492.0000 | 23100.0000 | 0.0009 | 0.0002 | 0.0009 | 0.0002 | 5.3400 | 5.3373 |
| Spain-MT292575.1           | 3.0000 | 2.0000  | 6536.5000 | 23238.5000 | 0.0005 | 0.0001 | 0.0005 | 0.0001 | 5.3341 | 5.3328 |
| Germany-MT394864.1         | 3.0000 | 3.0000  | 6284.1667 | 22371.8333 | 0.0005 | 0.0001 | 0.0005 | 0.0001 | 3.5608 | 3.5600 |
| Germany-MT582453.1         | 3.0000 | 4.0000  | 6536.8333 | 23238.1667 | 0.0005 | 0.0002 | 0.0005 | 0.0002 | 2.6667 | 2.6662 |
| USA-NY-MT371035.1          | 3.0000 | 7.0000  | 6524.3333 | 23199.6667 | 0.0005 | 0.0003 | 0.0005 | 0.0003 | 1.5241 | 1.5239 |
| USA-MT370841.1             | 5.0000 | 7.0000  | 6524.8333 | 23199.1667 | 0.0008 | 0.0003 | 0.0008 | 0.0003 | 2.5404 | 2.5397 |
| Italy-MT077125.1           | 0.0000 | 2.0000  | 6537.8333 | 23243.1667 | 0.0000 | 0.0001 | 0.0000 | 0.0001 | nan    | nan    |
| USA-MT370933.1             | 3.0000 | 3.0000  | 6522.1667 | 23192.8333 | 0.0005 | 0.0001 | 0.0005 | 0.0001 | 3.5568 | 3.5560 |
| USA-MT358731.1             | 4.0000 | 4.0000  | 6534.5000 | 23267.5000 | 0.0006 | 0.0002 | 0.0006 | 0.0002 | 3.5618 | 3.5607 |
| Czech Republic-MT371574.1  | 4.0000 | 3.0000  | 6529.0000 | 23225.0000 | 0.0006 | 0.0001 | 0.0006 | 0.0001 | 4.7445 | 4.7429 |
| NewZealand-EPI_ISL_417211  | 2.0000 | 0.0000  | 6513.0000 | 23166.0000 | 0.0003 | 0.0000 | 0.0003 | 0.0000 | nan    | nan    |
| Brazil-EPI_ISL_429691      | 4.0000 | 9.0000  | 5614.5000 | 20026.5000 | 0.0007 | 0.0004 | 0.0007 | 0.0004 | 1.5856 | 1.5853 |
| NewZealand-EPI_ISL_417212  | 1.0000 | 6.0000  | 6511.3333 | 23170.6667 | 0.0002 | 0.0003 | 0.0002 | 0.0003 | 0.5930 | 0.5931 |
| USA-MT375471.1             | 2.0000 | 5.0000  | 6491.6667 | 23151.3333 | 0.0003 | 0.0002 | 0.0003 | 0.0002 | 1.4266 | 1.4265 |
| Iran-MT380727.1            | 1.0000 | 0.0000  | 300.3333  | 1016.6667  | 0.0033 | 0.0000 | 0.0033 | 0.0000 | nan    | nan    |

Sd: the number of observed synonymous substitutions / Sn: The number of observed non-synonymous substitutions / S: The number of potential synonymous substitutions (the average for the two compared sequences) / N: The number of potential non-synonymous substitutions (the average for the two compared sequences) ps: The proportion of observed synonymous substitutions (Sd/S) / pn: The proportion of observed non-synonymous substitutions (Sn/N) / ds: The Jukes-Cantor correction for multiple hits of ps / dn: The Jukes-Cantor correction for multiple hits of pn/ ds/dn: The ratio of synonymous to non-synonymous substitutions. Note, the total number of mutations in a virus sequence is the sum of synonymous and non-synonymous substitutions (Sd+Sn).

**Table S3.** Nucleotide substitutions that have the greatest impact on RNA secondary structure in the 200 bp surrounding region of 1059 position in Nsp2 based on RNAsnp mode-3.

| Nsp2     | Mode 2   |          | Mode 1         |              |          |
|----------|----------|----------|----------------|--------------|----------|
| Mutation | Interval | p-value1 | Folding Window | Local region | p-value2 |
| G960A    | 20-50    | 0.0975   | 1-200          | 1-50         | 0.0467   |
| G960C    | 1-33     | 0.0047   | 1-200          | 1-50         | 0.0297   |
| G960U    | 20-50    | 0.0962   | 1-200          | 1-50         | 0.0395   |
| U961G    | 1-31     | 0.0238   | 1-200          | 132-199      | 0.0282   |
| G970C    | 1-31     | 0.0010   | 1-200          | 1-50         | 0.0379   |
| G1018U   | 53-125   | 0.0163   | 1-200          | 55-124       | 0.0299   |
| A1020C   | 56-125   | 0.0060   | 1-200          | 57-125       | 0.0203   |
| A1022C   | 61-124   | 0.0134   | 1-200          | 62-124       | 0.0331   |
| C1026G   | 30-71    | 0.0097   | 1-200          | 32-125       | 0.0384   |
| U1029C   | 59-125   | 0.0198   | 1-200          | 55-124       | 0.0372   |
| A1032C   | 53-125   | 0.0087   | 1-200          | 55-124       | 0.0267   |
| A1032U   | 53-125   | 0.0088   | 1-200          | 55-124       | 0.0269   |
| A1037C   | 52-125   | 0.0117   | 1-200          | 53-125       | 0.0313   |
| A1037U   | 52-125   | 0.0157   | 1-200          | 53-125       | 0.0394   |
| A1038C   | 52-125   | 0.0136   | 1-200          | 52-125       | 0.0383   |
| C1044G   | 77-134   | 0.0093   | 1-200          | 62-134       | 0.0211   |
| A1047C   | 78-127   | 0.0195   | 1-200          | 60-127       | 0.0335   |
| A1051G   | 52-106   | 0.0108   | 1-200          | 53-106       | 0.0334   |
| U1053C   | 52-106   | 0.0067   | 1-200          | 53-106       | 0.0248   |
| U1054G   | 61-120   | 0.0127   | 1-200          | 62-120       | 0.0381   |
| U1062G   | 55-110   | 0.0117   | 1-200          | 56-110       | 0.0343   |
| U1062C   | 61-124   | 0.0168   | 1-200          | 62-124       | 0.0449   |
| A1064C   | 61-124   | 0.0168   | 1-200          | 62-124       | 0.0471   |
| U1073G   | 83-124   | 0.0170   | 1-200          | 62-124       | 0.0265   |
| U1086G   | 99-135   | 0.0132   | 1-200          | 53-135       | 0.0480   |
| U1090G   | 77-133   | 0.0246   | 1-200          | 62-133       | 0.0439   |
| C1091G   | 77-134   | 0.0074   | 1-200          | 62-134       | 0.0224   |
| C1121G   | 142-198  | 0.0022   | 1-200          | 142-198      | 0.0126   |

**Table S4.** Nucleotide substitutions that have the most impact on RNA secondary structure on the 3'UTR based on RNAsnp mode-3.

| 3' UTR   | Mode 2   |          | Mode 1         |              |          |
|----------|----------|----------|----------------|--------------|----------|
| Mutation | Interval | p-value1 | Folding Window | Local region | p-value2 |
| A29700C  | 15-99    | 0.0860   | 1-226          | 11-93        | 0.0306   |
| G297003U | 15-99    | 0.0813   | 1-229          | 11-93        | 0.0406   |
| U29709C  | 15-46    | 0.0446   | 1-229          | 1-50         | 0.0431   |
| A29749C  | 15-99    | 0.0886   | 1-229          | 11-93        | 0.0224   |

**Table S5.** Nucleotide substitutions that have the greatest impact on RNA secondary structure on 3'UTR based on RaSE program. The dot-bracket-notation of MFE structure of mutated sequence is presented.

[illegible]

**Table S6.** Nucleotide substitutions that have the greatest impact on RNA secondary structure of 200 bp flanking region of 1059 nucleotide in Nsp2 based on RaSE program. The dot-bracket-notation of MFE structure of mutated sequence is presented.

[illegible]

**Table S7.** The effect of mutations in SARS-CoV-2 genes on prediction of host miRNA binding and total free energy of binding miRNA binding using ltaRNA and RNAup tools. Conserved mutations are indicated with asterisks.

| Target |         | Predicted miRNA | Total free energy of binding |        |
|--------|---------|-----------------|------------------------------|--------|
|        |         |                 | ltaRNA                       | RNAup  |
| Nsp3   | WT      | miR-197-5p      | -12.24                       | -13.37 |
|        | *C3037U | -               | -8.53                        | -9.75  |
| Nsp4   | WT      | miR-3935        | -13.39                       | -14.73 |
|        | A9259G  | -               | -13.48                       | -14.78 |
| Nsp4   | WT      | miR-18b-5p      | -13.72                       | -13.5  |
|        | *G9802U | -               | -10.13                       | -9.6   |
|        | *C9803U | -               | -8.7                         | -8.85  |
| Nsp12  | WT      | miR-1273d       | -16.42                       | -16.61 |
|        | C15293U | miR-1273d       | -15.22                       | -15.48 |
| S      | WT      | miR-338-3p      | -6.98                        | -6.54  |
|        | C24034U | -               | -6.98                        | -6.54  |
|        | G24057A | -               | -8                           | -7.83  |
| S      | WT      | miR-4661-3p     | -19.2                        | -14.41 |
|        | G25311U | -               | -17.23                       | -13.14 |

**Table S8.** Putative donor and acceptor splice sites and splice motifs in SARS-CoV-2 genome.

| Region | 5' Donor site | 3' Acceptor site | ESE | ESS | ISE | ISS |
|--------|---------------|------------------|-----|-----|-----|-----|
| 5' UTR | -             | 1                | -   | -   | -   | -   |
| Nsp1   | 2             | -                | 1   | 1   | 8   | -   |
| Nsp2   | 1             | 1                | 3   | 2   | 6   | 1   |
| Nsp3   | 3             | 3                | 25  | 12  | 25  | -   |
| Nsp4   | 4             | -                | 6   | 1   | 6   | -   |
| Nsp5   | 2             | 1                | 3   | 3   | 6   | -   |
| Nsp6   | -             | 3                | -   | 1   | 5   | -   |
| Nsp7   | -             | -                | 2   | 2   | -   | -   |
| Nsp8   | 1             | -                | 5   | 1   | 2   | -   |
| Nsp9   | 1             | -                | 2   | -   | 2   | -   |
| Nsp10  | 1             | -                | 2   | -   | 1   | -   |
| Nsp11  | -             | -                | -   | -   | 1   | -   |
| Nsp12  | 1             | 5                | 9   | 7   | 10  | -   |
| Nsp13  | 2             | 2                | 5   | 1   | 9   | -   |
| Nsp14  | 1             | 3                | 4   | 1   | 7   | -   |
| Nsp15  | -             | -                | 1   | 1   | -   | -   |
| Nsp16  | -             | 1                | 1   | 1   | -   | -   |
| S      | -             | 6                | 6   | 3   | 14  | 1   |
| ORF3a  | -             | 3                | 4   | 3   | 3   | -   |
| E      | 1             | 1                | -   | -   | 4   | -   |
| M      | -             | 1                | 1   | 2   | 5   | -   |
| ORF6   | -             | -                | -   | 1   | 1   | -   |
| ORF7a  | -             | 1                | 1   | -   | 3   | -   |
| ORF7b  | -             | -                | -   | -   | -   | -   |
| ORF8   | 1             | -                | 1   | -   | 1   | -   |
| N      | 2             | 3                | 7   | 7   | 6   | -   |
| ORF10  | -             | -                | -   | -   | -   | -   |
| 3' UTR | -             | -                | -   | 1   | -   | -   |

ESE; exon splicing enhancer, ESS; exon splicing silencer, ISE; intron splicing enhancer, ISS; intron splicing silencer.
